# Supplementary material
Source: MDPI journal article supplement (https://www.mdpi.com/2674-0516/2/4/45)
Supplement: s1 [file s1]

## Electronic supplementary information for manuscript

### “Solid dispersions of fenbendazole with polymers and succinic acid obtained by methods of mechanochemistry, their chemical stability and anthelmintic efficiency”

Salavat Khalikov, Ekaterina Khakina, Marat Khalikov and Anastasiya Varlamova

#### Table of contents

|                                                                                                                              |   |
|------------------------------------------------------------------------------------------------------------------------------|---|
| Figure S1. <sup>1</sup> H NMR spectrum of AG (solvent – DMSO-d <sub>6</sub> ).....                                           | 2 |
| Figure S2. <sup>1</sup> H NMR spectrum of AG (solvent – D <sub>2</sub> O). .....                                             | 2 |
| Figure S3. <sup>1</sup> H NMR spectrum of FBZ (solvent – D <sub>2</sub> O). .....                                            | 3 |
| Figure S4. <sup>1</sup> H NMR spectrum of SD with compositions FBZ:AG (solvent – D <sub>2</sub> O). .....                    | 3 |
| Figure S5. <sup>1</sup> H NMR spectrum of the FBZ and succinic acid reaction product II (solvent DMSO-d <sub>6</sub> ).....  | 4 |
| Figure S6. <sup>1</sup> H NMR spectrum of the FBZ and succinic acid reaction product III (solvent DMSO-d <sub>6</sub> )..... | 4 |
| Figure S7. HPLC of SD with composition FBZ:PVP:SA (295 nm) .....                                                             | 5 |
| Figure S8. Total ion current chromatogram of SD with composition FBZ:PVP:SA.....                                             | 5 |
| Figure S9. HPLC of SD with composition FBZ:PVP (295 nm) .....                                                                | 6 |
| Figure S10. Total ion current chromatogram of SD with composition FBZ:PVP (signal at 0.867 min corresponds to PVP).....      | 6 |
| Figure S11. Total ion current chromatogram of product II .....                                                               | 7 |
| Figure S12. Total ion current chromatogram of product III.....                                                               | 7 |
| Figure S13. Outer standard method calibration for FBZ quantification (295 nm).....                                           | 8 |
| Figure S14. Outer standard method calibration for FBZ quantification (total ion current for positive ions) .....             | 8 |

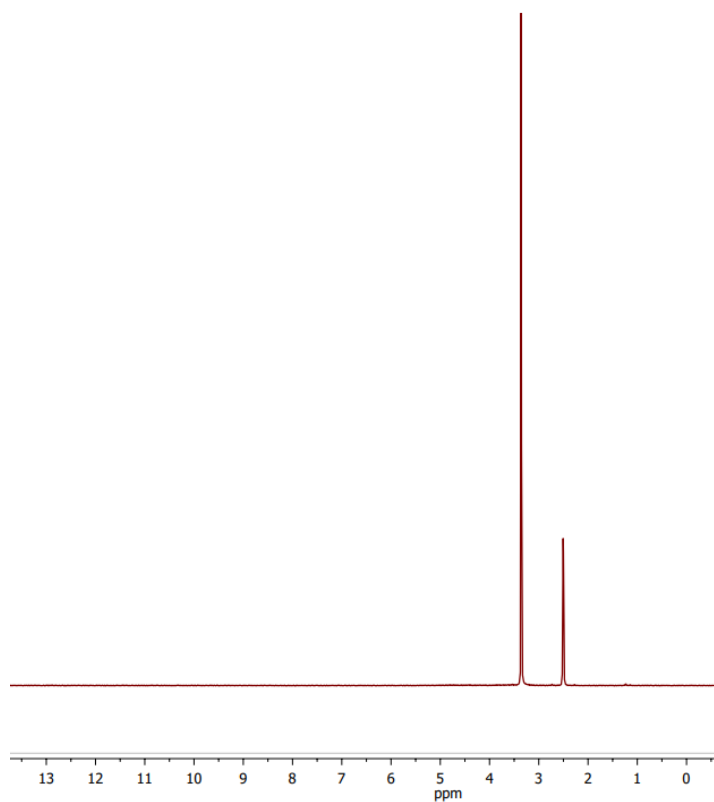

**Figure S1.**  $^1\text{H}$  NMR spectrum of AG (solvent –  $\text{DMSO-d}_6$ ).

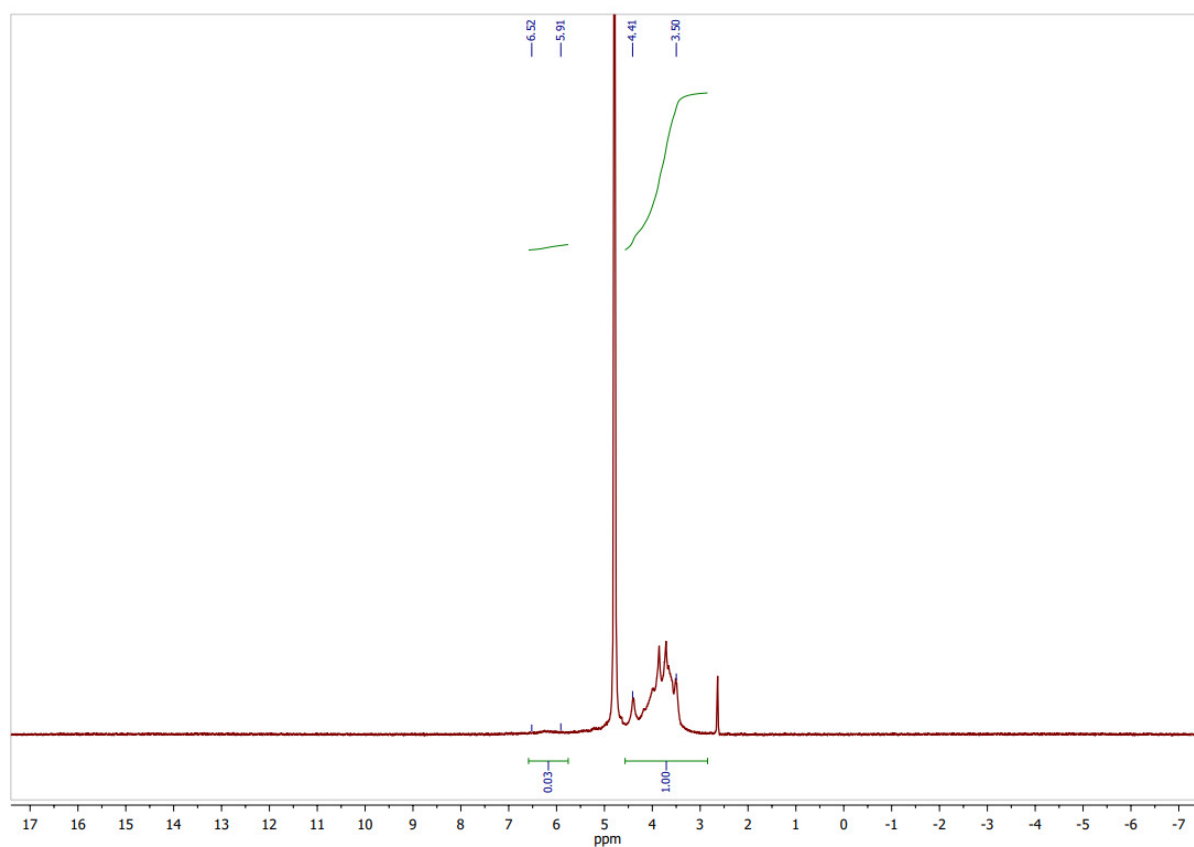

**Figure S2.**  $^1\text{H}$  NMR spectrum of AG (solvent –  $\text{D}_2\text{O}$ ).

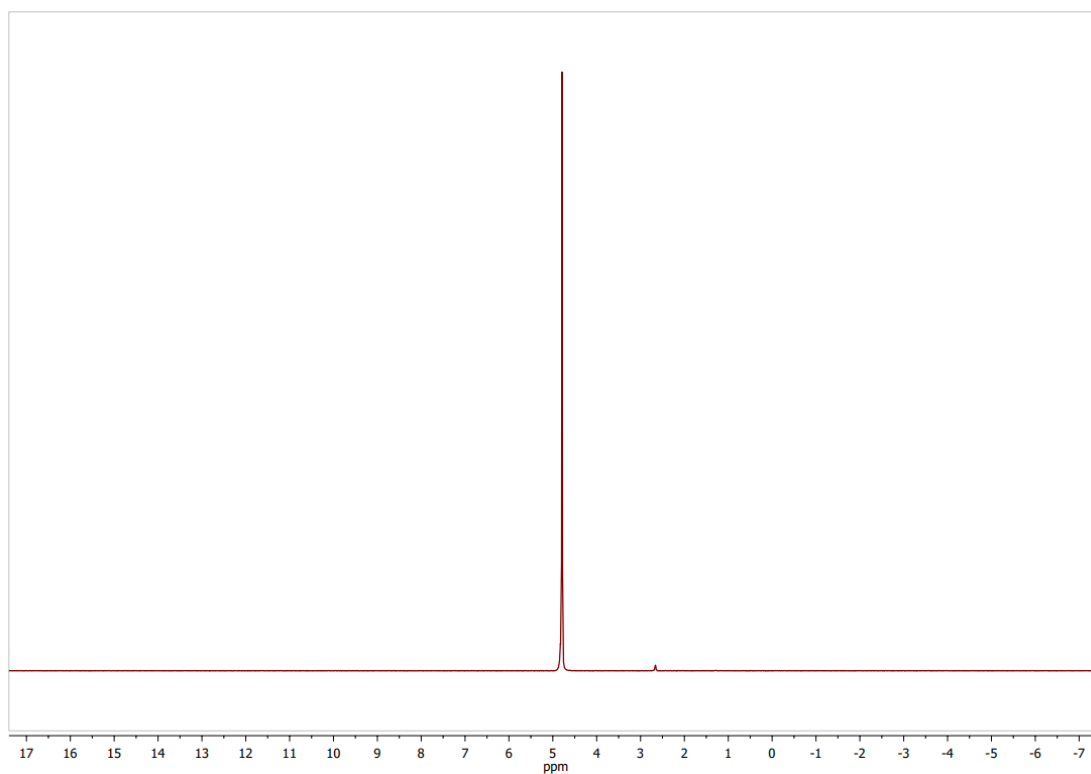

**Figure S3.**  $^1\text{H}$  NMR spectrum of FBZ (solvent –  $\text{D}_2\text{O}$ ).

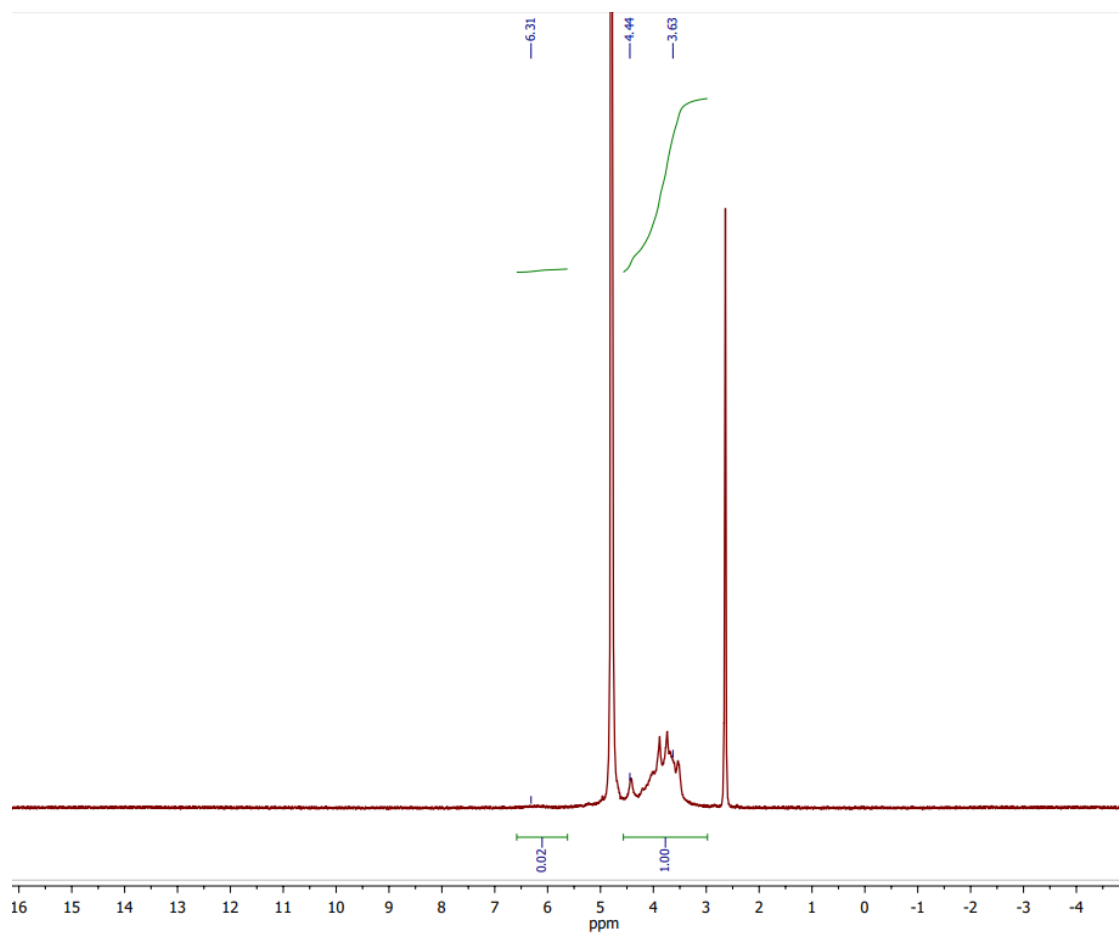

**Figure S4.**  $^1\text{H}$  NMR spectrum of SD with compositions FBZ:AG (solvent –  $\text{D}_2\text{O}$ ).

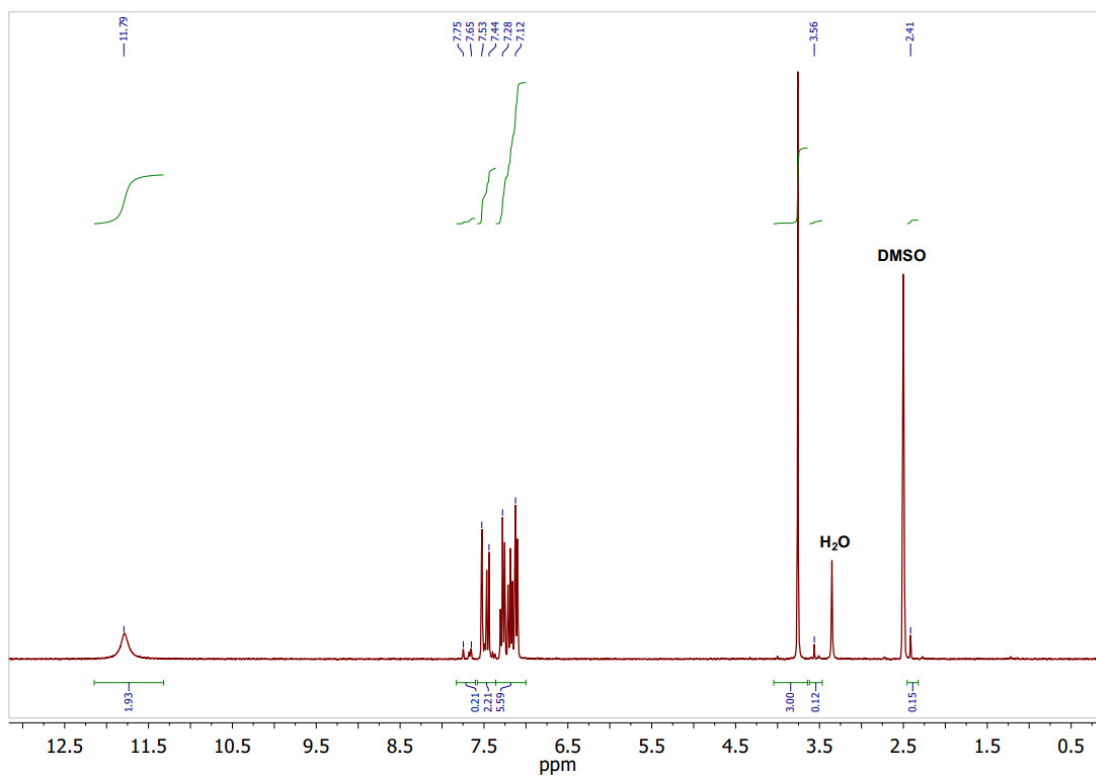

**Figure S5.** <sup>1</sup>H NMR spectrum of the FBZ and succinic acid reaction product II (solvent DMSO-d<sub>6</sub>).

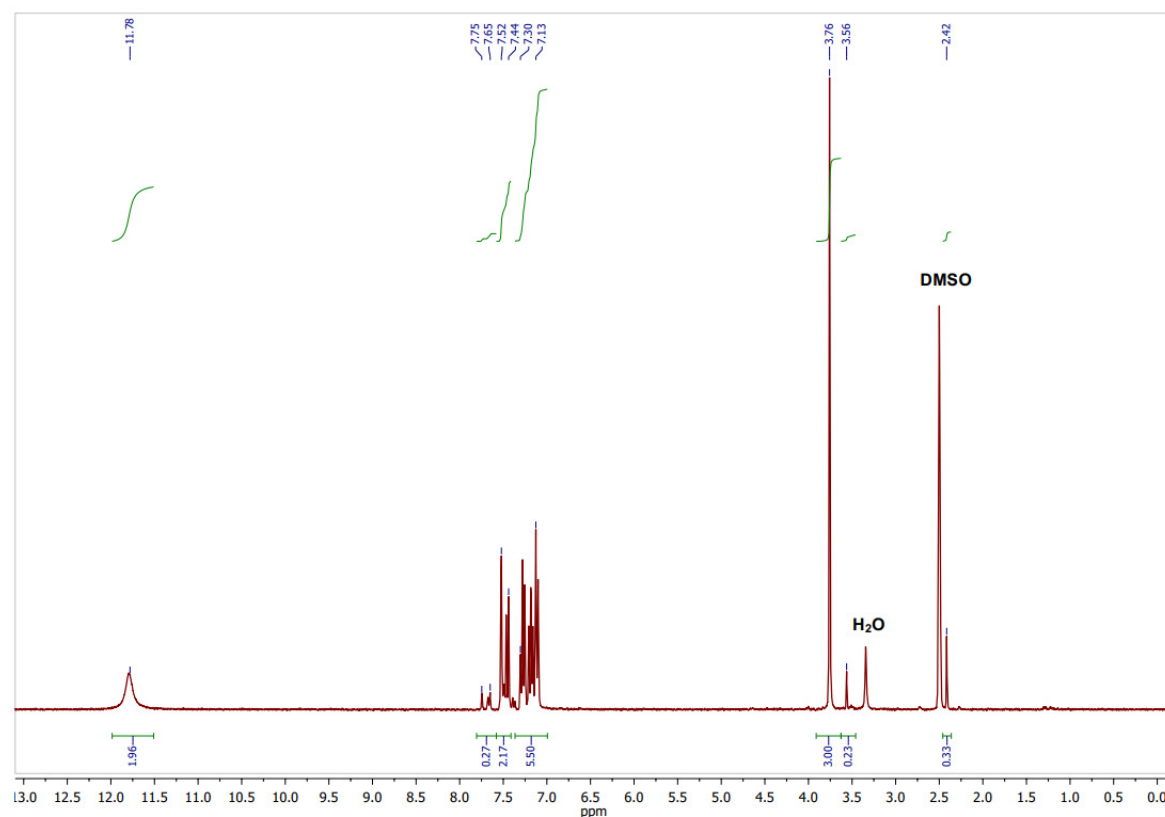

**Figure S6.** <sup>1</sup>H NMR spectrum of the FBZ and succinic acid reaction product III (solvent DMSO-d<sub>6</sub>).

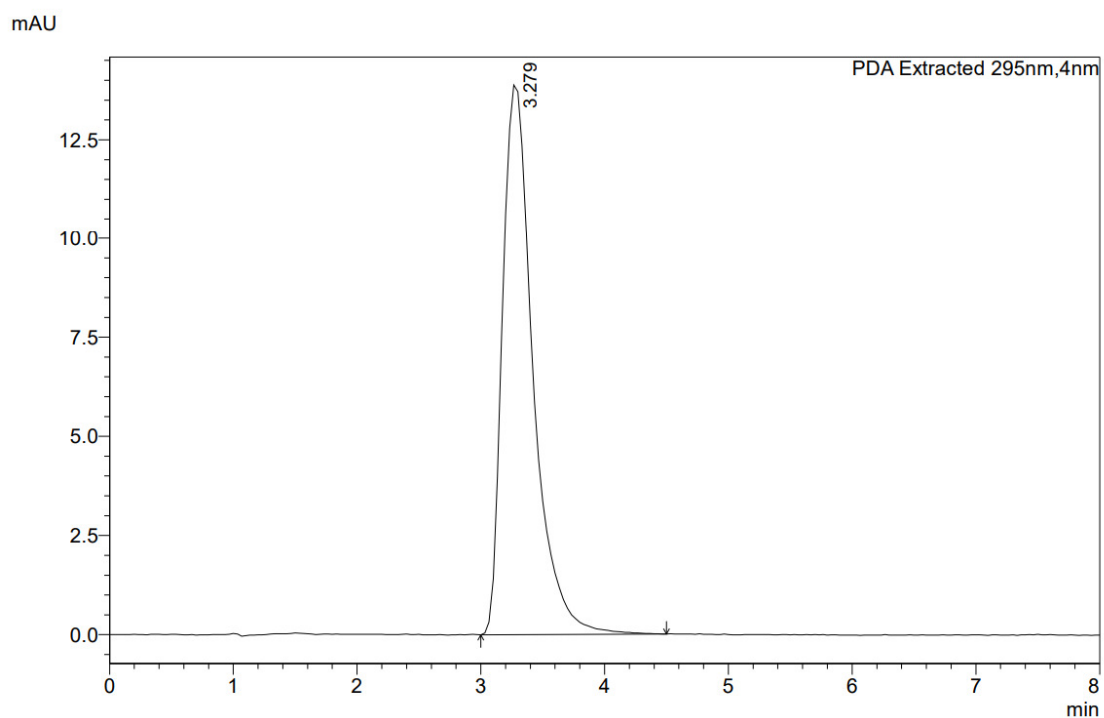

**Figure S7. HPLC of SD with composition FBZ:PVP:SA (295 nm)**

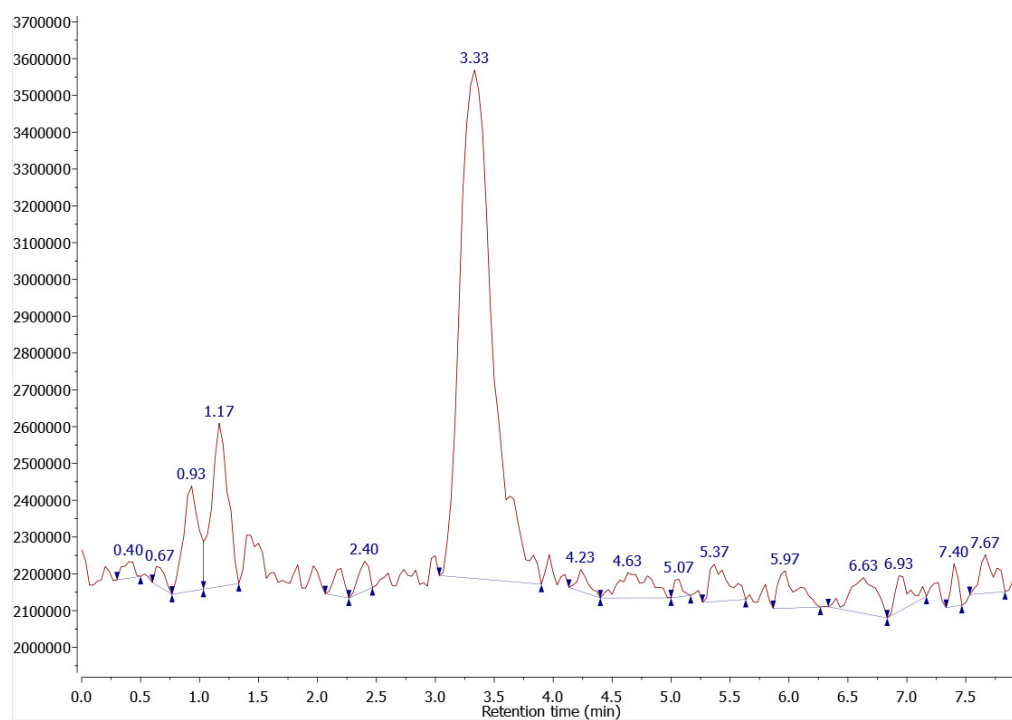

**Figure S8. Total ion current chromatogram of SD with composition FBZ:PVP:SA**

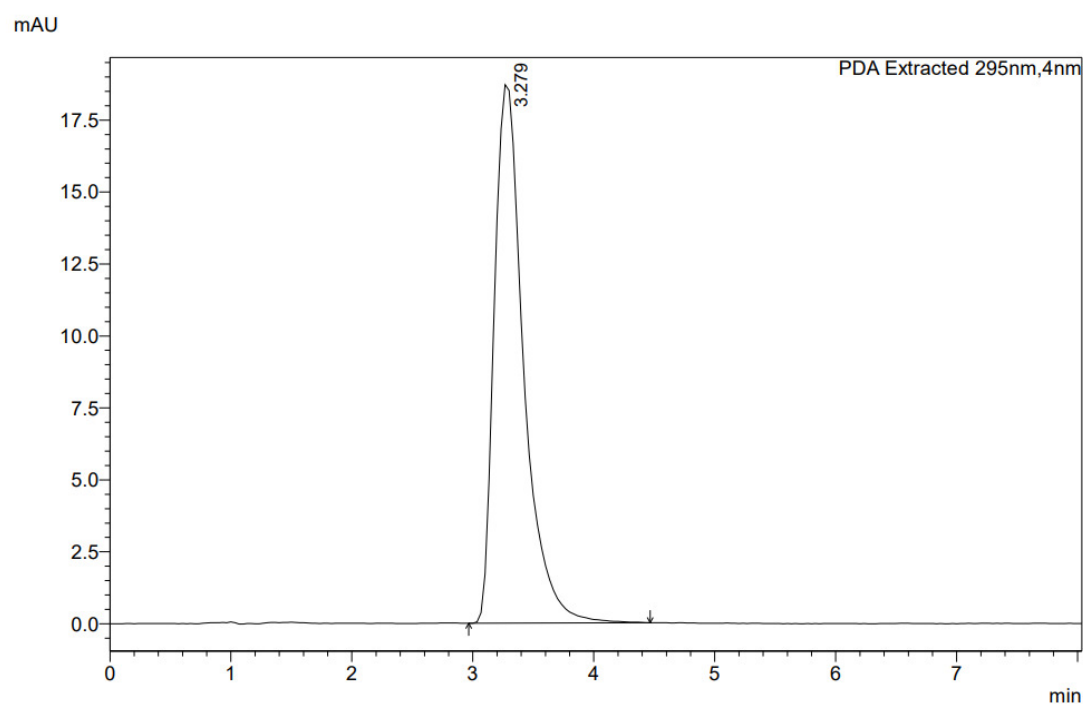

**Figure S9. HPLC of SD with composition FBZ:PVP (295 nm)**

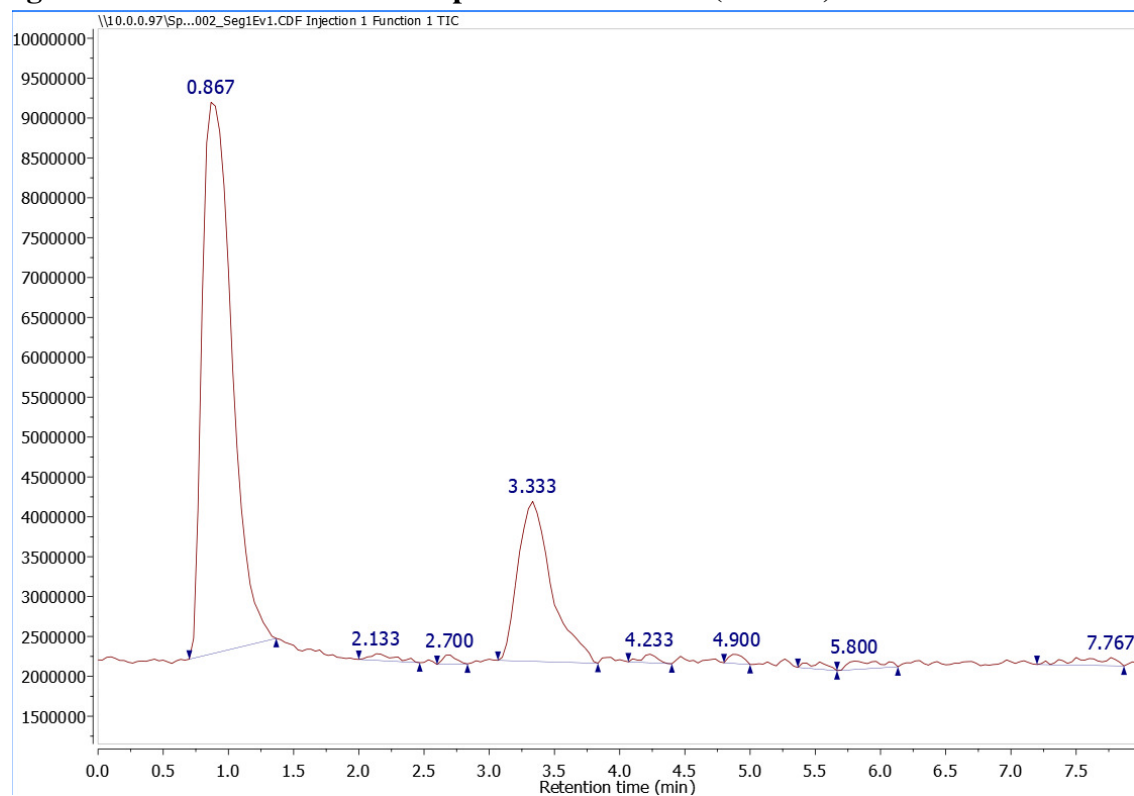

**Figure S10. Total ion current chromatogram of SD with composition FBZ:PVP (signal at 0.867 min corresponds to PVP)**

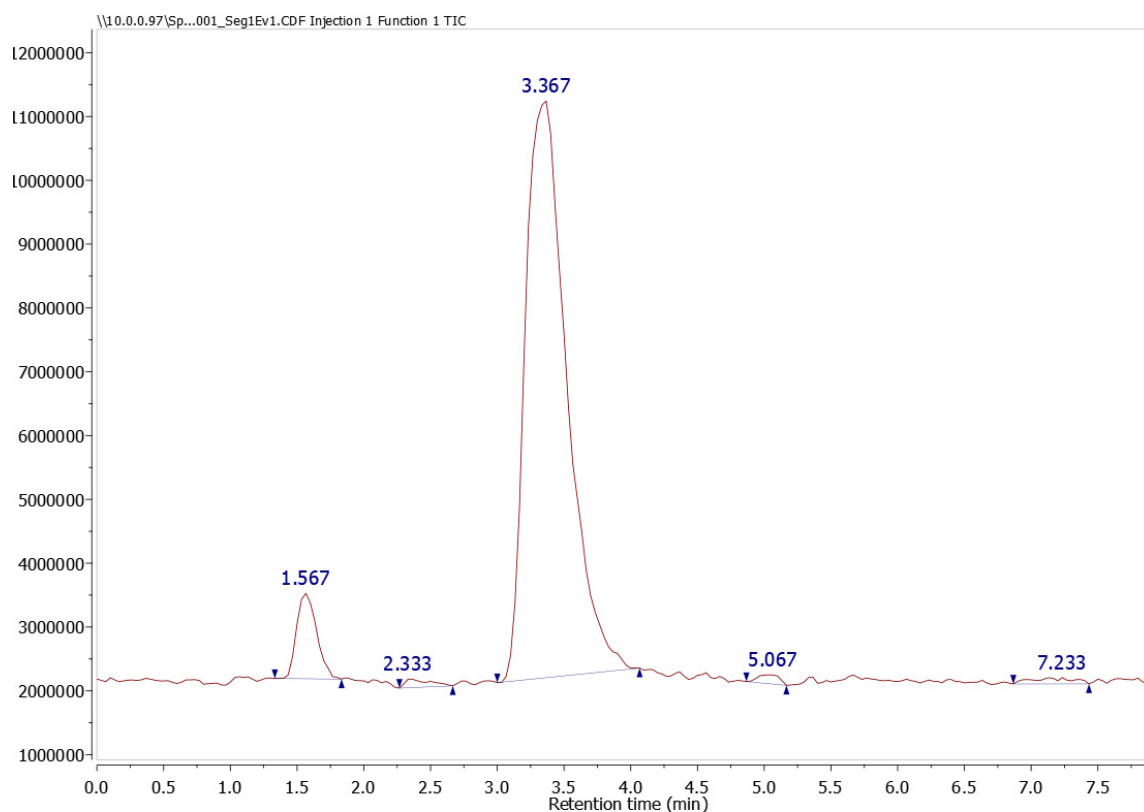

**Figure S11. Total ion current chromatogram of product II**

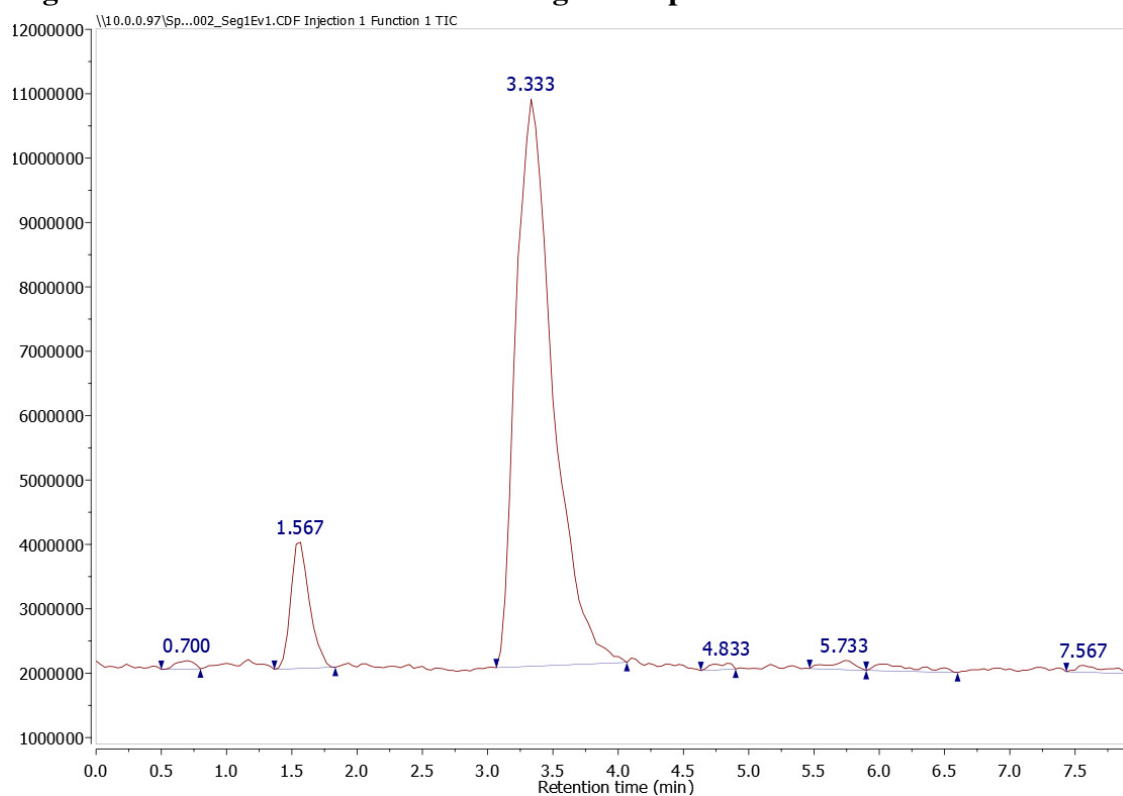

**Figure S12. Total ion current chromatogram of product III**

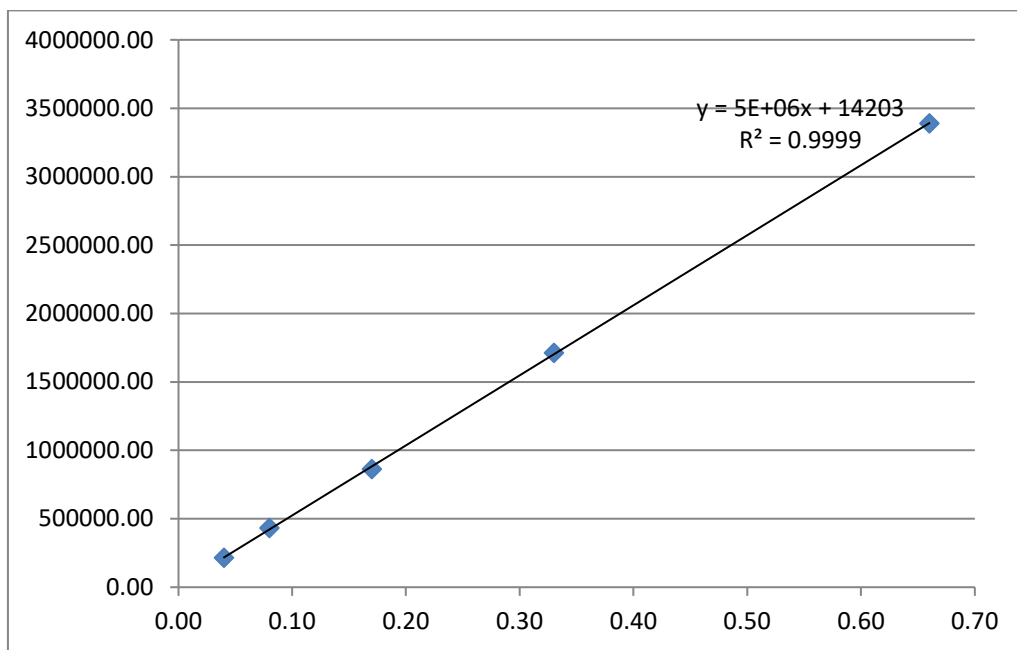

**Figure S13. Outer standard method calibration for FBZ quantification (295 nm)**

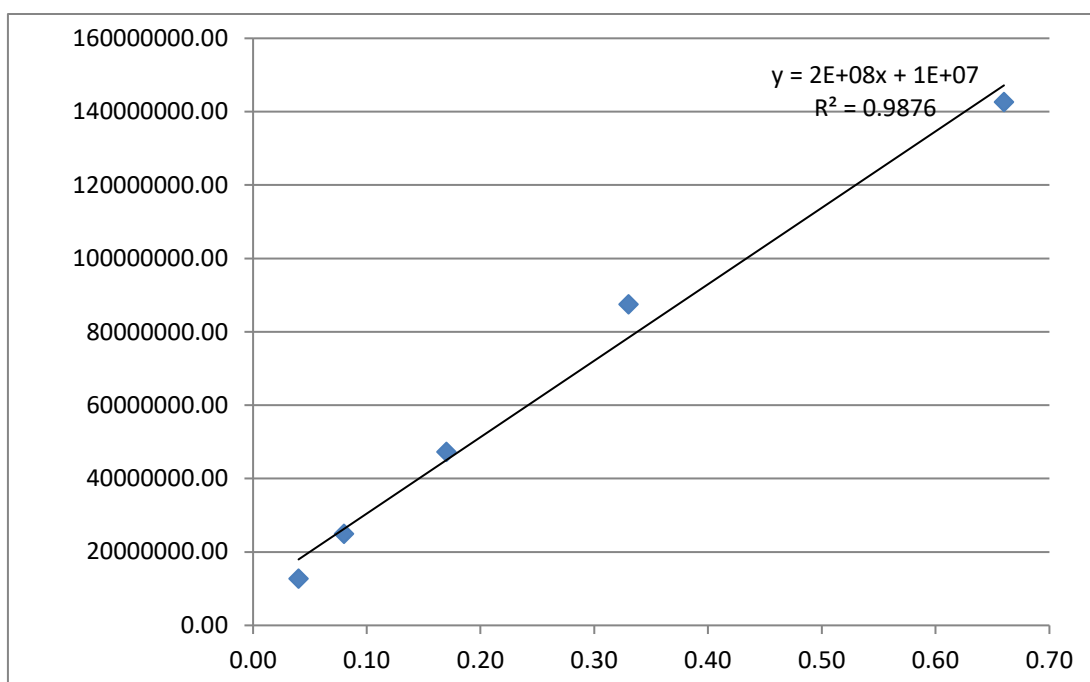

**Figure S14. Outer standard method calibration for FBZ quantification (total ion current for positive ions)**
